# Supplementary material for: The Relationship Between Nursing Undergraduates' Artificial Intelligence Readiness, Learning Motivation, and Artificial Intelligence Anxiety: A Mediation and Network Analysis Study
Source: Research Square preprint supplement (doi:10.21203/rs.3.rs-8128531/v1), 2025-12-16
Supplement: Supplementary file 1 [file 8035631ae53e27eb2c05fd48.docx]

**Table S1.** Strength of edges in the AIR, LM and AIA network

| Edge | Partial correlation coefficient |
| --- | --- |
| Ability-Extrinsic Motivation | 0.15 |
| Ability- Learning | -0.15 |
| Intrinsic Motivation-learning | -0.14 |
| Intrinsic Motivation- Job Replacement | -0.13 |
| Cognition- Learning | -0.12 |
| Intrinsic Motivation-Sociotechnical Blind | -0.11 |
| Cognition- Intrinsic Motivation | 0.11 |
| Extrinsic Motivation- Learning | -0.11 |
| Ability- Sociotechnical Blind | -0.09 |
| Ability- AI Configuration | -0.08 |
| Intrinsic Motivation- AI Configuration | -0.08 |
| Cognition- AI Configuration | -0.08 |
| Vision- Sociotechnical Blind | -0.07 |
| Extrinsic Motivation- Sociotechnical Blind | -0.07 |
| Ethics- Job Replacement | -0.07 |
| Cognition- Sociotechnical Blind | -0.07 |
| Extrinsic Motivation- Sociotechnical Blind | -0.06 |
| Ability- Intrinsic Motivation | 0.06 |
| Vision- Extrinsic Motivation | 0.06 |
| Vision- Job Replacement | -0.06 |
| Vision- Intrinsic Motivation | 0.06 |
| Ability- Job Replacement | -0.06 |
| Vision- AI Configuration | -0.05 |
| Cognition- Extrinsic Motivation | 0.05 |
| Cognition- Job Replacement | -0.05 |
| Ethics- AI Configuration | -0.05 |
| Ethics- Learning | -0.04 |
| Vision- Learning | -0.04 |
| Ethics- Extrinsic Motivation | 0.01 |
| Ethics- Sociotechnical Blind | -0.00 |


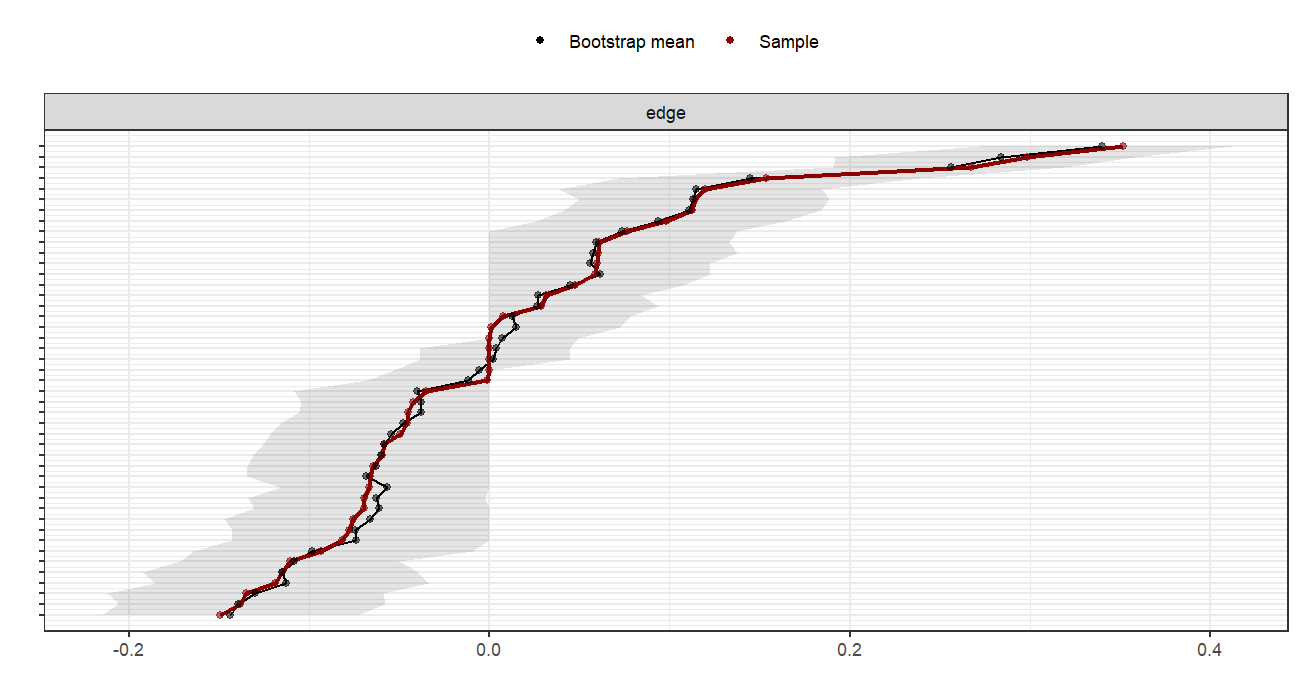
**Fig. S1** Accuracy of edge weight in the AIR-LM-AIA network.


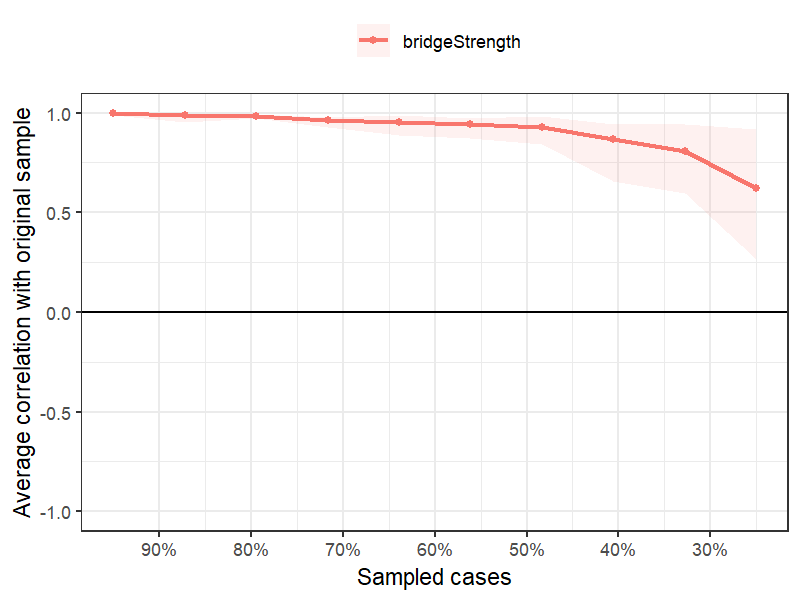

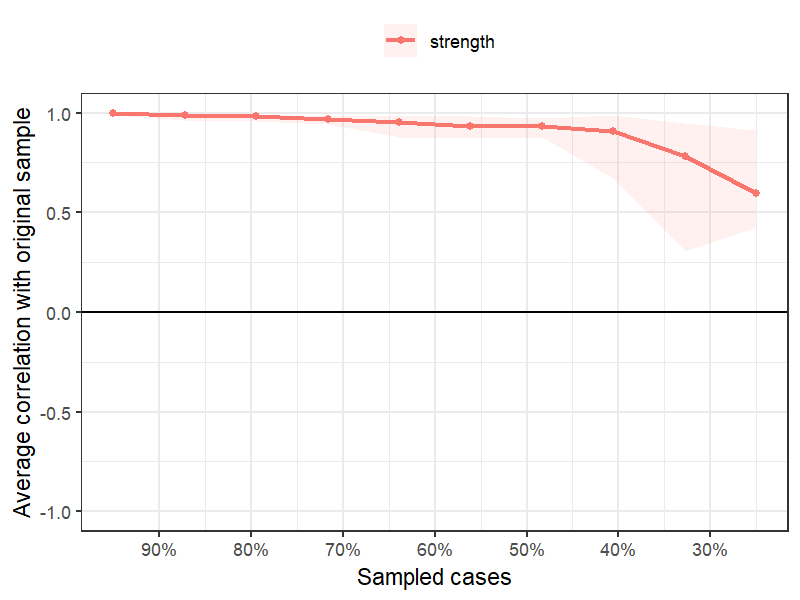


**Fig. S2** Stability in the AIR-LM-AIA network
